# Supplementary material
Source: PubMed Central journal article supplement (PMC2952203)
Supplement: supp_M110.112110_jbc.M110.112110-1.pdf [file supp_M110.112110_jbc.M110.112110-1.pdf]

## SUPPLEMENTAL DATA

***Interaction of Hsp90 $\beta$  variants with WT p53 in vitro, measured by ultracentrifugation.*** To further confirm our finding, that ATP binding to Hsp90 destabilizes the Hsp90-p53 complex, we performed ultracentrifugation in 10-30% (w/v) glycerol gradient (Sup. 1). This method was applied previously to isolate steroid hormone receptor complex with Hsp90 (1). It is particularly useful in separation of large complexes of hydrophobic proteins, since the separation takes place in solution and improper interactions with the resin may be omitted. WT Hsp90 $\beta$  or E42A and D88N variants were preincubated with WT p53 protein at 37°C and subsequently loaded on the top of 10-30% (w/v) glycerol gradient and separated by ultracentrifugation. We show that in the presence of ATP, only the Hsp90 $\beta$  D88N variant is still found in the same fractions as WT p53, while WT Hsp90 and E42A variant do not co-sediment with a significant amount of p53, upon treatment with ATP (Sup. 1). This suggests that similarly to ELISA experiments (Fig. 2, main text), the p53-Hsp90 $\beta$  complex is dissociated upon ATP binding to Hsp90 $\beta$ .

Interestingly, the amount of WT p53 protein detected after incubation with ATP was lower than in case of incubation without nucleotide. This observation indicates that ATP has a direct effect on p53 as was previously reported (2,3), here most likely represented by a change in a WT p53 aggregation level. However, the Hsp90 $\beta$  D88N variant, in the presence or absence of ATP, is able to shift the WT p53 sedimentation towards lighter fractions. This fact may aid to explain the limited, positive effect of Hsp90 $\beta$  D88N on WT p53 function and stability *in vitro* and in cells (Fig. 3-6, main text), most likely achieved by a passive WT p53 aggregation prevention.

Moreover, p53 incubated in 37°C had propensity to form a high molecular mass aggregates, too large to separate in a used gradient and sedimenting at the bottom of the centrifuge tube. Hsp90 $\beta$  was mostly dimeric as judged by a size exclusion chromatography (data not shown) and in 10-30% glycerol gradient sedimented in lighter fractions (Sup.1, shown only for WT Hsp90 $\beta$ ; E42A and D88N variants sediment in the same fractions – not shown). Native p53 tetramer at 4°C sedimented in 10-30% glycerol gradient in similar density fractions (Sup. 1, controls, 4°C). The Hsp90 $\beta$ -

p53 complex sedimented in most dense fractions, that suggested stoichiometry of dimer Hsp90 to tetramer p53 or an even larger mass complex.

***Hsp90 $\beta$  E42A variant is unable to reactivate the R249S p53 in cells.*** We have tested the Hsp90 variants solo and in combination with the Hsc70-Hsp40 system in attempt to restore the transcriptional activity to selected oncogenic p53 variants in H1299 cells. The cellular background was therefore the same as in experiments with WT p53 described in the main text (Fig. 4-6). The example of the activity of R249S p53 is shown in Sup. 2. In this experiment, E42A Hsp90 $\beta$  – the most efficient Hsp90 $\beta$  variant in the reactivation of R249S p53 *in vitro* (Fig. 3, main text) was transiently overproduced in cells together with R249S p53, also combined with the Hsc70-Hsp40 chaperone system. We have previously shown that Hsc/p70-Hdj1/2 setups cooperate with Hsp90 $\beta$  in the R249S reactivation *in vitro* (4). However, none of the used combinations was sufficient to restore the transcriptional activity of R249S significantly in H1299 cells, as tested by the luciferase reporter assay (Sup. 2). Such was also the case of other tested p53 oncogenic variants, namely V143A, R175H, G245S, R248Q, R273H and R282W (not shown). This suggests that while Hsp90 E42A is effective in increasing the WT p53 activity (Fig. 5, main text), it does not provide a straightforward solution for a reactivation of the most frequent p53 oncogenic variants.

## SUPPLEMENTAL EXPERIMENTAL PROCEDURES

***Analytical Hsp90 $\beta$  – p53 complex ultracentrifugation.*** For analytical centrifugation 10  $\mu$ mol Hsp90 and 0,2  $\mu$ mol p53 were incubated for 1 hour at 37°C in buffer 25mM Tris 7,5, 10 mM MgCl<sub>2</sub>, 50 mM KCl. Samples were cooled and immediately loaded on the top of 13ml 10-30% w/v glycerol gradient in the same buffer prepared on Gradient Master ip 170 (BioComp) device. When indicated 5mM ATP was added during Hsp90 and p53 incubation. Sample were centrifuged at 140 000 g in SW41 rotor (Beckman) for 16h at 4°C. 46 samples of volume 250  $\mu$ l were taken starting from the bottom of the gradient tube (sample 1), and 1  $\mu$ l of each was spotted on nitrocellulose. Dot- blot membranes were developed with anti p53 DO-1

(Moravian Biotechnology) or anti- Hsp90 SPA-846 (Sterssgen) antibodies. Blots were scanned on GS-800 scanner (Biorad) and the density of the dots quantified with program ImageQuant TL (Amersham Pharmacia).

*Luciferase reporter assay.* The activity measurement of WT and R249S p53 was carried

out using luciferase reporter assay, as described in main text Experimental procedures. Vectors transiently transfected in R249S p53 reactivation attempts were as follows: pCMV-WTp53, pCMV-R249Sp53, pCDNA-FLAG-HA, pCDNA-FLAG-HA-Hsp90 $\beta$  WT/E42A, pCDNA-Hsp40 (Hdj1), pE-HA-Hsc70.

#### REFERENCES:

1. Inano, K., Haino, M., Iwasaki, M., Ono, N., Horigome, T., and Sugano, H. (1990) *FEBS Lett* **267**(1), 157-159
2. Warnock, L. J., and Raines, S. A. (2004) *Cancer Biol Ther* **3**(7), 634-637
3. Okorokov, A. L., and Milner, J. (1999) *Mol Cell Biol* **19**(11), 7501-7510
4. Walerych, D., Olszewski, M. B., Gutkowska, M., Helwak, A., Zylicz, M., and Zylicz, A. (2009) *Oncogene* **28**(48), 4284-4294
