# Supplementary material
Source: PubMed Central journal article supplement (PMC2952203)
Supplement: supp_M110.112110_jbc.M110.112110-2.pdf [file supp_M110.112110_jbc.M110.112110-2.pdf]

## Sup. 1

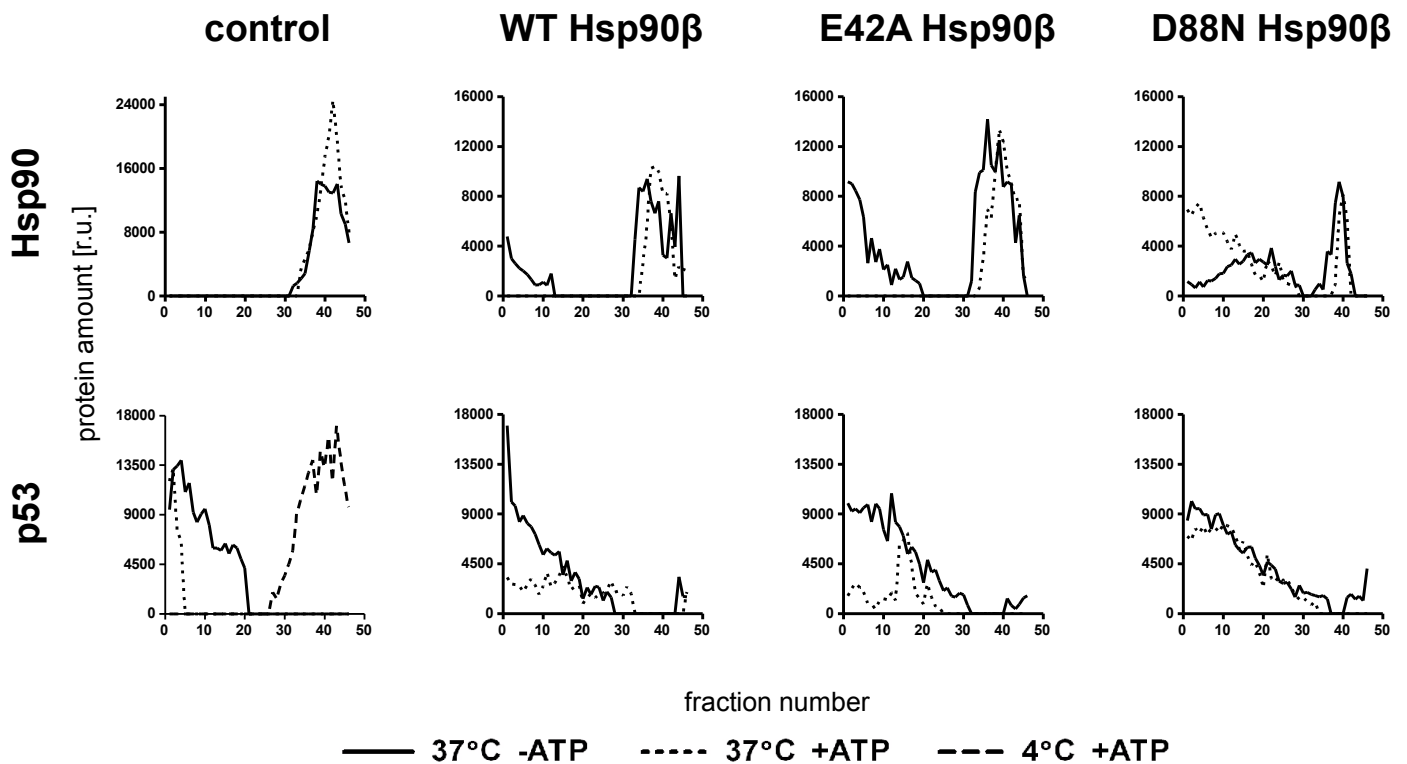

Sup.1 Influence of ATP on the Hsp90β – WT p53 interaction, measured by the analytical ultracentrifugation. The graphs represent results of densitometric analysis of blotted sample fractions (detected with anti-p53 DO-1 or anti-Hsp90 SPA-846 antibodies), post-ultracentrifugation in 10-30% w/v glycerol gradient. Samples are numbered from heavier to lighter fractions (sample 1 on the bottom of a tube, contains largest mass protein complexes/aggregates). Controls are Hsp90β WT and p53 WT incubated and centrifuged alone. All Hsp90β variants become shifted to heavier
