# Supplementary material
Source: PubMed Central journal article supplement (PMC2952203)
Supplement: supp_M110.112110_jbc.M110.112110-3.pdf [file supp_M110.112110_jbc.M110.112110-3.pdf]

## Sup. 2

### p21 (*WAF1*) promoter-controlled Luciferase activity in H1299 cells

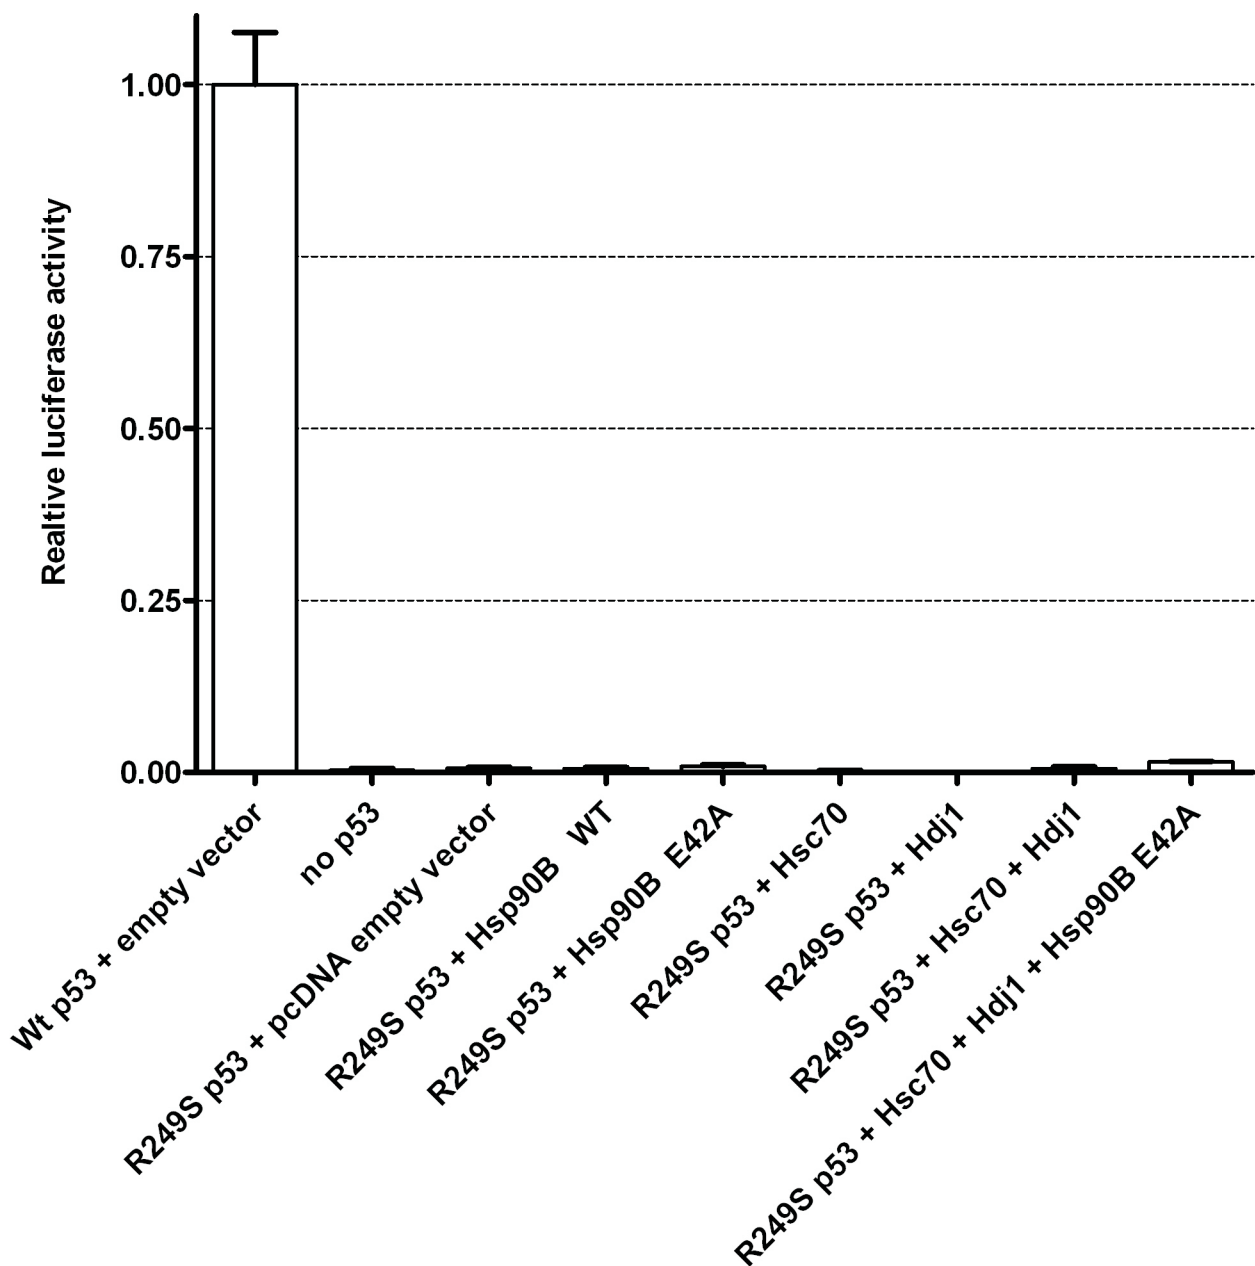

Sup.2 p53 R249S activity can not be rescued by Hsp90 $\beta$  WT/E42A overproduction. p53 activity was measured using luciferase reporter system as described in Supplemental experimental procedures. Bars indicate activity of Firefly luciferase produced from p21-luc vector (luciferase under *WAF1* promoter) as a fraction of WT p53-controlled activity (first bar), with standard errors. R249S p53 activity is at the background level, and can not be rescued by transient overproduction of Hsp90 $\beta$  WT/E42A alone, nor in the presence of overproduced human Hsc70 (Hsp70-8) and human Hsp40 (Hdj1).
